# Supplementary material
Source: Springer Nature journal article supplement (https://www.springermedizin.de/resource/supplementary/12888_2012_1320_MOESM4_ESM.pdf/9479884)

**LS Mean Change from Baseline in  
MADRS Total Score (LOCF)**

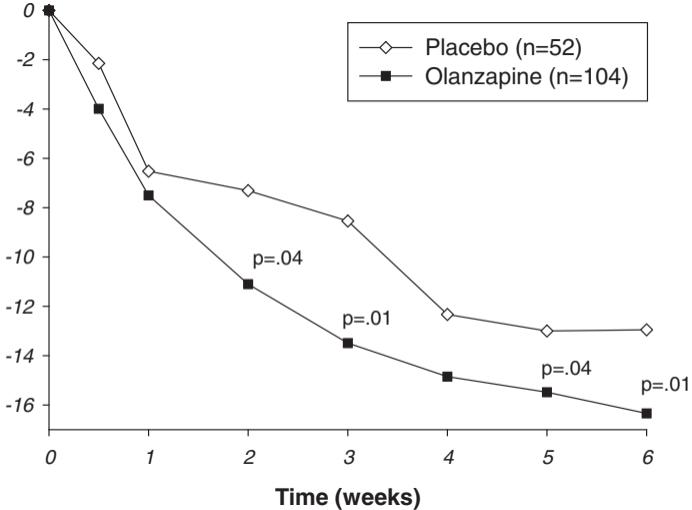

Supplement: MOESM4 [file 9479884]
